# Supplementary material
Source: MDPI journal article supplement (https://www.mdpi.com/2312-7481/8/1/8)
Supplement: s1 [file s1]

Supporting Information for:

# Steric Quenching of Mn(III) Thermal Spin Crossover: Dilution of Cooperativity in Immobilized Solutions

Komala Pandurangan <sup>1†</sup>, Anthony B. Carter <sup>1†</sup>, Paulo N. Martinho <sup>1‡</sup>, Brendan Gildea <sup>1</sup>, Shang Shi <sup>1</sup>, Tibebe Lemma<sup>2</sup>, Aizuddin Sultan <sup>1</sup>, Tia E. Keyes <sup>2</sup>, Helge Müller-Bunz <sup>1</sup> and Grace G. Morgan <sup>1\*</sup>

<sup>1</sup> School of Chemistry, University College Dublin (UCD), Belfield, Dublin 4, Ireland

<sup>2</sup> School of Chemical Sciences, Dublin City University, Dublin 9, Ireland

<sup>‡</sup> Present Address: Biosystems and Integrative Sciences Institute (BioISI), Faculdade de Ciências, Universidade de Lisboa, Campo Grande, Lisboa, 1749-016, Portugal; Centro de Química Estrutural, Faculdade de Ciências Universidade de Lisboa, Campo Grande, 1749-016, Lisboa, Portugal.

<sup>†</sup> These authors contributed equally to this work.

<sup>\*</sup> Correspondence: grace.morgan@ucd.ie

## Contents

|                                                                                              |   |
|----------------------------------------------------------------------------------------------|---|
| Table S1 – Crystallographic details for compounds 1 – 3.....                                 | 2 |
| Table S2 – Crystallographic details for compounds 4 & 5.....                                 | 3 |
| Table S3 – Crystallographic details for compounds 6 & 7.....                                 | 4 |
| Table S4 – Crystallographic details for compounds 10 – 12.....                               | 5 |
| Table S5 – Raman vibration modes of complexes (10) – (12) collected at room temperature..... | 6 |
| Figure S1 – C <sub>6</sub> -Alkylated complex 6 viewed along b-axis .....                    | 7 |
| Figure S2 – C <sub>12</sub> -Alkylated complex 7 viewed along the b-axis .....               | 7 |
| Figure S3 – C <sub>6</sub> -Alkylated complex 10 viewed along the c-axis.....                | 7 |
| Figure S4 – C <sub>12</sub> -Alkylated complex 11 viewed along the a-axis.....               | 8 |

Table S1 – Crystallographic details for compounds 1 – 3.

L1 = 4,6-diOMe-sal2323

| Compound                          | [Mn(L1)]ClO <sub>4</sub> ·0.5H <sub>2</sub> O (1)                                                                                                       | [Mn(L1)]NO <sub>3</sub> ·1.15H <sub>2</sub> O (2)                                                                                                        | [Mn(L1)]BF <sub>4</sub> ·0.85H <sub>2</sub> O (3)                                                                                                        |
|-----------------------------------|---------------------------------------------------------------------------------------------------------------------------------------------------------|----------------------------------------------------------------------------------------------------------------------------------------------------------|----------------------------------------------------------------------------------------------------------------------------------------------------------|
| sample code                       | mor460                                                                                                                                                  | mor1695sqz                                                                                                                                               | mor458                                                                                                                                                   |
| Empirical formula                 | C <sub>26</sub> H <sub>37</sub> N <sub>4</sub> O <sub>10.5</sub> Cl Mn                                                                                  | C <sub>26</sub> H <sub>38.30</sub> N <sub>5</sub> O <sub>10.15</sub> Mn                                                                                  | C <sub>26</sub> H <sub>37.70</sub> B N <sub>4</sub> O <sub>6.85</sub> F <sub>4</sub> Mn                                                                  |
| Molecular formula                 | [C <sub>26</sub> H <sub>36</sub> N <sub>4</sub> O <sub>6</sub> Mn] <sup>+</sup> [O <sub>4</sub> Cl] <sup>−</sup> x 0.5 (H <sub>2</sub> O) <sup>a)</sup> | [C <sub>26</sub> H <sub>36</sub> N <sub>4</sub> O <sub>6</sub> Mn] <sup>+</sup> [N O <sub>3</sub> ] <sup>−</sup> x 1.15 (H <sub>2</sub> O) <sup>a)</sup> | [C <sub>26</sub> H <sub>36</sub> N <sub>4</sub> O <sub>6</sub> Mn] <sup>+</sup> [B F <sub>4</sub> ] <sup>−</sup> x 0.85 (H <sub>2</sub> O) <sup>a)</sup> |
| Formula weight                    | 663.99                                                                                                                                                  | 638.25                                                                                                                                                   | 657.65                                                                                                                                                   |
| Temperature                       | 100(2) K                                                                                                                                                | 100(2) K                                                                                                                                                 | 100(2) K                                                                                                                                                 |
| Wavelength                        | 0.71073 Å                                                                                                                                               | 1.54184 Å                                                                                                                                                | 1.54184 Å                                                                                                                                                |
| Crystal system                    | Monoclinic                                                                                                                                              | Monoclinic                                                                                                                                               | Monoclinic                                                                                                                                               |
| Space group                       | P2 <sub>1</sub> /n (#14)                                                                                                                                | P2 <sub>1</sub> /c (#15)                                                                                                                                 | P2 <sub>1</sub> /c (#14)                                                                                                                                 |
| Unit cell dimensions              | a = 7.4001(2) Å<br>b = 25.9281(5) Å<br>c = 15.8508(4) Å<br>α = 90°<br>β = 103.392(2)°<br>γ = 90°                                                        | a = 7.4383(2) Å<br>b = 25.0727(7) Å<br>c = 15.9190(5) Å<br>α = 90°<br>β = 102.857(3)°<br>γ = 90°                                                         | a = 7.3927(2) Å<br>b = 25.5359(5) Å<br>c = 15.8964(4) Å<br>α = 90°<br>β = 103.035(3)°<br>γ = 90°                                                         |
| Volume                            | 2958.60(12) Å <sup>3</sup>                                                                                                                              | 2894.43(15) Å <sup>3</sup>                                                                                                                               | 2923.58(12) Å <sup>3</sup>                                                                                                                               |
| Z                                 | 4                                                                                                                                                       | 4                                                                                                                                                        | 4                                                                                                                                                        |
| Density (calculated)              | 1.491 Mg/m <sup>3</sup>                                                                                                                                 | 1.465 Mg/m <sup>3</sup>                                                                                                                                  | 1.494 Mg/m <sup>3</sup>                                                                                                                                  |
| Absorption coefficient            | 0.600 mm <sup>−1</sup>                                                                                                                                  | 4.272 mm <sup>−1</sup>                                                                                                                                   | 4.347 mm <sup>−1</sup>                                                                                                                                   |
| F(000)                            | 1388                                                                                                                                                    | 1342                                                                                                                                                     | 1370                                                                                                                                                     |
| Crystal size                      | 0.2927 x 0.1785 x 0.1047 mm <sup>3</sup>                                                                                                                | 0.090 x 0.060 x 0.030 mm <sup>3</sup>                                                                                                                    | 0.2957 x 0.0697 x 0.0378 mm <sup>3</sup>                                                                                                                 |
| Theta range for data collection   | 3.41 to 29.69°.                                                                                                                                         | 3.349 to 76.715°.                                                                                                                                        | 3.34 to 77.06°.                                                                                                                                          |
| Index ranges                      | −10<=h<=9, −34<=k<=34, −21<=l<=21                                                                                                                       | −9<=h<=9, −29<=k<=31, −19<=l<=12                                                                                                                         | −8<=h<=9, −32<=k<=31, −19<=l<=17                                                                                                                         |
| Reflections collected             | 33572                                                                                                                                                   | 20052                                                                                                                                                    | 25054                                                                                                                                                    |
| Independent reflections           | 7424 [R(int) = 0.0229]                                                                                                                                  | 6026 [R(int) = 0.0437]                                                                                                                                   | 6113 [R(int) = 0.0404]                                                                                                                                   |
| Completeness to theta = 26.00°    | 99.1 %                                                                                                                                                  | 100.0 %                                                                                                                                                  | 98.8 %                                                                                                                                                   |
| Absorption correction             | Analytical                                                                                                                                              | Gaussian                                                                                                                                                 | Analytical                                                                                                                                               |
| Max. and min. transmission        | 0.941 and 0.884                                                                                                                                         | 0.951 and 0.792                                                                                                                                          | 0.863 and 0.415                                                                                                                                          |
| Refinement method                 | Full-matrix least-squares on F <sup>2</sup>                                                                                                             | Full-matrix least-squares on F <sup>2</sup>                                                                                                              | Full-matrix least-squares on F <sup>2</sup>                                                                                                              |
| Data / restraints / parameters    | 7424 / 21 / 435 <sup>b)</sup>                                                                                                                           | 6026 / 0 / 383                                                                                                                                           | 6113 / 1 / 436 <sup>b)</sup>                                                                                                                             |
| Goodness-of-fit on F <sup>2</sup> | 1.277                                                                                                                                                   | 1.026                                                                                                                                                    | 1.091                                                                                                                                                    |
| Final R indices [I>2sigma(I)]     | R1 = 0.0568, wR2 = 0.1216                                                                                                                               | R1 = 0.0529, wR2 = 0.1364                                                                                                                                | R1 = 0.0458, wR2 = 0.1067                                                                                                                                |
| R indices (all data)              | R1 = 0.0623, wR2 = 0.1230                                                                                                                               | R1 = 0.0609, wR2 = 0.1426                                                                                                                                | R1 = 0.0508, wR2 = 0.1085                                                                                                                                |
| Largest diff. peak and hole       | 0.465 and −0.506 e.Å <sup>−3</sup>                                                                                                                      | 0.669 and −1.013 e.Å <sup>−3</sup>                                                                                                                       | 0.324 and −0.954 e.Å <sup>−3</sup>                                                                                                                       |
| CCDC no.                          | 2124581                                                                                                                                                 | 2124586                                                                                                                                                  | 2124580                                                                                                                                                  |

Table S2 – Crystallographic details for compounds 4 & 5.

L1 = 4,6-diOMe-sal2323

| Compound                          | [Mn(L1)]CF <sub>3</sub> SO <sub>3</sub> (4)                                                                                      | [Mn(L1)]Cl·C <sub>2</sub> H <sub>5</sub> OH (5)                                                                                     |
|-----------------------------------|----------------------------------------------------------------------------------------------------------------------------------|-------------------------------------------------------------------------------------------------------------------------------------|
| sample code                       | mor474                                                                                                                           | mor1681                                                                                                                             |
| Empirical formula                 | C <sub>27</sub> H <sub>36</sub> N <sub>4</sub> O <sub>9</sub> F <sub>3</sub> S Mn                                                | C <sub>28</sub> H <sub>42</sub> N <sub>4</sub> O <sub>7</sub> Cl Mn                                                                 |
| Molecular formula                 | [C <sub>26</sub> H <sub>36</sub> N <sub>4</sub> O <sub>6</sub> Mn] <sup>+</sup> [C O <sub>3</sub> F <sub>3</sub> S] <sup>−</sup> | [C <sub>26</sub> H <sub>36</sub> N <sub>4</sub> O <sub>6</sub> Mn] <sup>+</sup> [Cl] <sup>−</sup> x C <sub>2</sub> H <sub>6</sub> O |
| Formula weight                    | 704.60                                                                                                                           | 637.04                                                                                                                              |
| Temperature                       | 100(2) K                                                                                                                         | 100(2) K                                                                                                                            |
| Wavelength                        | 0.71073 Å                                                                                                                        | 1.54184 Å                                                                                                                           |
| Crystal system                    | Triclinic                                                                                                                        | Orthorhombic                                                                                                                        |
| Space group                       | P-1 (#2)                                                                                                                         | P2 <sub>1</sub> 2 <sub>1</sub> 2 <sub>1</sub> (#19)                                                                                 |
| Unit cell dimensions              | a = 7.6509(2) Å<br>b = 13.6659(3) Å<br>c = 14.8979(3) Å<br>α = 81.821(2)°<br>β = 78.568(2)°<br>γ = 87.964(2)°                    | a = 7.7595(2) Å<br>b = 17.3258(4) Å<br>c = 21.6335(3) Å<br>α = 90°<br>β = 90°<br>γ = 90°                                            |
| Volume                            | 1511.20(6) Å <sup>3</sup>                                                                                                        | 2908.40(11) Å <sup>3</sup>                                                                                                          |
| Z                                 | 2                                                                                                                                | 4                                                                                                                                   |
| Density (calculated)              | 1.548 Mg/m <sup>3</sup>                                                                                                          | 1.455 Mg/m <sup>3</sup>                                                                                                             |
| Absorption coefficient            | 0.584 mm <sup>−1</sup>                                                                                                           | 4.979 mm <sup>−1</sup>                                                                                                              |
| F(000)                            | 732                                                                                                                              | 1344                                                                                                                                |
| Crystal size                      | 0.3313 x 0.2396 x 0.1169 mm <sup>3</sup>                                                                                         | 0.230 x 0.020 x 0.020 mm <sup>3</sup>                                                                                               |
| Theta range for data collection   | 3.28 to 30.63°.                                                                                                                  | 3.268 to 76.893°.                                                                                                                   |
| Index ranges                      | −10 ≤ h ≤ 10, −19 ≤ k ≤ 19, −21 ≤ l ≤ 21                                                                                         | −9 ≤ h ≤ 9, −21 ≤ k ≤ 21, −27 ≤ l ≤ 26                                                                                              |
| Reflections collected             | 90343                                                                                                                            | 33312                                                                                                                               |
| Independent reflections           | 9241 [R(int) = 0.0445]                                                                                                           | 6087 [R(int) = 0.0903]                                                                                                              |
| Completeness to theta = 26.00°    | 99.2 %                                                                                                                           | 100.0 %                                                                                                                             |
| Absorption correction             | Analytical                                                                                                                       | Gaussian                                                                                                                            |
| Max. and min. transmission        | 0.947 and 0.850                                                                                                                  | 1.000 and 0.562                                                                                                                     |
| Refinement method                 | Full-matrix least-squares on F <sup>2</sup>                                                                                      | Full-matrix least-squares on F <sup>2</sup>                                                                                         |
| Data / restraints / parameters    | 9241 / 0 / 418                                                                                                                   | 6087 / 0 / 376                                                                                                                      |
| Goodness-of-fit on F <sup>2</sup> | 1.051                                                                                                                            | 0.931                                                                                                                               |
| Final R indices [I > 2σ(I)]       | R1 = 0.0277, wR2 = 0.0719                                                                                                        | R1 = 0.0343, wR2 = 0.0634                                                                                                           |
| R indices (all data)              | R1 = 0.0318, wR2 = 0.0748                                                                                                        | R1 = 0.0473, wR2 = 0.0677                                                                                                           |
| Largest diff. peak and hole       | 0.510 and −0.433 e.Å <sup>−3</sup>                                                                                               | 0.275 and −0.258 e.Å <sup>−3</sup>                                                                                                  |
| CCDC no.                          | 2124582                                                                                                                          | 2124585                                                                                                                             |

Table S3 – Crystallographic details for compounds 6 & 7.

L2 = 4,6-diOMe-sal2323-C<sub>6</sub>

L3 = 4,6-diOMe-sal2323-C<sub>12</sub>

| Compound                          | [Mn(L2)](BF <sub>4</sub> ) <sub>0.8</sub> (ClO <sub>4</sub> ) <sub>0.2</sub> ·2CH <sub>3</sub> OH (6)                                                                                                          | [Mn(L3)]ClO <sub>4</sub> (7)                                                                                     |
|-----------------------------------|----------------------------------------------------------------------------------------------------------------------------------------------------------------------------------------------------------------|------------------------------------------------------------------------------------------------------------------|
| sample code                       | mor538                                                                                                                                                                                                         | mor486                                                                                                           |
| Empirical formula                 | C <sub>40</sub> H <sub>68</sub> B <sub>0.79</sub> N <sub>4</sub> O <sub>8.82</sub> F <sub>3.18</sub> Cl <sub>0.21</sub> Mn                                                                                     | C <sub>50</sub> H <sub>84</sub> N <sub>4</sub> O <sub>10</sub> Cl Mn                                             |
| Molecular formula                 | [C <sub>38</sub> H <sub>60</sub> N <sub>4</sub> O <sub>6</sub> Mn] <sup>+</sup> {[BF <sub>4</sub> ] <sup>−</sup> } <sub>0.79</sub> {[ClO <sub>4</sub> ] <sup>−</sup> } <sub>0.21</sub> x 2 (CH <sub>4</sub> O) | [C <sub>50</sub> H <sub>84</sub> N <sub>4</sub> O <sub>6</sub> Mn] <sup>+</sup> [ClO <sub>4</sub> ] <sup>−</sup> |
| Formula weight                    | 877.34                                                                                                                                                                                                         | 991.60                                                                                                           |
| Temperature                       | 100(2) K                                                                                                                                                                                                       | 100(2) K                                                                                                         |
| Wavelength                        | 0.71073 Å                                                                                                                                                                                                      | 1.54184 Å                                                                                                        |
| Crystal system                    | Monoclinic                                                                                                                                                                                                     | Monoclinic                                                                                                       |
| Space group                       | P2 <sub>1</sub> /c (#14)                                                                                                                                                                                       | P2 <sub>1</sub> /c (#14)                                                                                         |
| Unit cell dimensions              | a = 13.3746(2) Å<br>b = 19.7053(3) Å<br>c = 16.9698(3) Å<br>α = 90°<br>β = 103.383(2)°<br>γ = 90°                                                                                                              | a = 16.8651(4) Å<br>b = 19.6544(3) Å<br>c = 17.4379(4) Å<br>α = 90°<br>β = 118.068(3)°<br>γ = 90°                |
| Volume                            | 4350.95(12) Å <sup>3</sup>                                                                                                                                                                                     | 5100.4(2) Å <sup>3</sup>                                                                                         |
| Z                                 | 4                                                                                                                                                                                                              | 4                                                                                                                |
| Density (calculated)              | 1.339 Mg/m <sup>3</sup>                                                                                                                                                                                        | 1.291 Mg/m <sup>3</sup>                                                                                          |
| Absorption coefficient            | 0.386 mm <sup>−1</sup>                                                                                                                                                                                         | 3.068 mm <sup>−1</sup>                                                                                           |
| F(000)                            | 1870.3                                                                                                                                                                                                         | 2136                                                                                                             |
| Crystal size                      | 0.2140 x 0.1463 x 0.1111 mm <sup>3</sup>                                                                                                                                                                       | 0.2379 x 0.1870 x 0.0897 mm <sup>3</sup>                                                                         |
| Theta range for data collection   | 3.34 to 24.13°.                                                                                                                                                                                                | 3.73 to 77.20°.                                                                                                  |
| Index ranges                      | −15<=h<=15, −22<=k<=22, −19<=l<=19                                                                                                                                                                             | −17<=h<=21, −24<=k<=24, −21<=l<=18                                                                               |
| Reflections collected             | 74650                                                                                                                                                                                                          | 59849                                                                                                            |
| Independent reflections           | 6916 [R(int) = 0.0500]                                                                                                                                                                                         | 10606 [R(int) = 0.0455]                                                                                          |
| Completeness to theta = 26.00°    | 99.6 %                                                                                                                                                                                                         | 98.0 %                                                                                                           |
| Absorption correction             | Analytical                                                                                                                                                                                                     | Analytical                                                                                                       |
| Max. and min. transmission        | 0.968 and 0.942                                                                                                                                                                                                | 0.809 and 0.659                                                                                                  |
| Refinement method                 | Full-matrix least-squares on F <sup>2</sup>                                                                                                                                                                    | Full-matrix least-squares on F <sup>2</sup>                                                                      |
| Data / restraints / parameters    | 6916 / 0 / 534                                                                                                                                                                                                 | 10606 / 0 / 601                                                                                                  |
| Goodness-of-fit on F <sup>2</sup> | 1.074                                                                                                                                                                                                          | 1.019                                                                                                            |
| Final R indices [I>2sigma(I)]     | R1 = 0.0500, wR2 = 0.1339                                                                                                                                                                                      | R1 = 0.0512, wR2 = 0.1389                                                                                        |
| R indices (all data)              | R1 = 0.0582, wR2 = 0.1409                                                                                                                                                                                      | R1 = 0.0595, wR2 = 0.1501                                                                                        |
| Largest diff. peak and hole       | 0.966 and −0.462 e.Å <sup>−3</sup>                                                                                                                                                                             | 0.858 and −0.714 e.Å <sup>−3</sup>                                                                               |
| CCDC no.                          | 2124584                                                                                                                                                                                                        | 2124583                                                                                                          |

Table S4 – Crystallographic details for compounds 10 – 12

L6 = 3-OMe-sal2323-C<sub>6</sub>

L7 = 3-OMe-sal2323-C<sub>12</sub>

L8 = 3-OMe-sal2323-C<sub>18</sub>

| Compound                          | [Mn(L6)]PF <sub>6</sub> (10)                                                                                    | [Mn(L7)]PF <sub>6</sub> ·CH <sub>3</sub> CN (11)                                                                                                  | [Mn(L8)]PF <sub>6</sub> ·CH <sub>2</sub> Cl <sub>2</sub> (12)                                                                                       |
|-----------------------------------|-----------------------------------------------------------------------------------------------------------------|---------------------------------------------------------------------------------------------------------------------------------------------------|-----------------------------------------------------------------------------------------------------------------------------------------------------|
| sample code                       | mor420                                                                                                          | mor455                                                                                                                                            | mor415                                                                                                                                              |
| Empirical formula                 | C <sub>36</sub> H <sub>56</sub> N <sub>4</sub> O <sub>4</sub> F <sub>6</sub> P Mn                               | C <sub>50</sub> H <sub>83</sub> N <sub>5</sub> O <sub>4</sub> F <sub>6</sub> P Mn                                                                 | C <sub>61</sub> H <sub>106</sub> N <sub>4</sub> O <sub>4</sub> F <sub>6</sub> P Cl <sub>2</sub> Mn                                                  |
| Molecular formula                 | [C <sub>36</sub> H <sub>56</sub> N <sub>4</sub> O <sub>4</sub> Mn] <sup>+</sup> [F <sub>6</sub> P] <sup>−</sup> | [C <sub>48</sub> H <sub>80</sub> N <sub>4</sub> O <sub>4</sub> Mn] <sup>+</sup> [F <sub>6</sub> P] <sup>−</sup> x C <sub>2</sub> H <sub>3</sub> N | [C <sub>60</sub> H <sub>104</sub> N <sub>4</sub> O <sub>4</sub> Mn] <sup>+</sup> [F <sub>6</sub> P] <sup>−</sup> x C H <sub>2</sub> Cl <sub>2</sub> |
| Formula weight                    | 808.76                                                                                                          | 1018.12                                                                                                                                           | 1230.31                                                                                                                                             |
| Temperature                       | 100(2) K                                                                                                        | 100(2) K                                                                                                                                          | 100(2) K                                                                                                                                            |
| Wavelength                        | 1.54184 Å                                                                                                       | 0.71073 Å                                                                                                                                         | 1.54184 Å                                                                                                                                           |
| Crystal system                    | Orthorhombic                                                                                                    | Triclinic                                                                                                                                         | Triclinic                                                                                                                                           |
| Space group                       | Pbca (#61)                                                                                                      | P-1 (#2)                                                                                                                                          | P-1 (#2)                                                                                                                                            |
| Unit cell dimensions              | a = 12.85980(8) Å<br>b = 23.0422(1) Å<br>c = 26.4148(1) Å<br>α = 90°<br>β = 90°<br>γ = 90°                      | a = 10.8732(3) Å<br>b = 11.2191(3) Å<br>c = 23.1991(6) Å<br>α = 95.990(2)°<br>β = 90.914(2)°<br>γ = 108.469(2)°                                   | a = 10.7351(7) Å<br>b = 11.6319(5) Å<br>c = 27.552(1) Å<br>α = 82.052(4)°<br>β = 85.333(4)°<br>γ = 71.201(5)°                                       |
| Volume                            | 7827.18(7) Å <sup>3</sup>                                                                                       | 2665.98(12) Å <sup>3</sup>                                                                                                                        | 3223.1(3) Å <sup>3</sup>                                                                                                                            |
| Z                                 | 8                                                                                                               | 2                                                                                                                                                 | 2                                                                                                                                                   |
| Density (calculated)              | 1.373 Mg/m <sup>3</sup>                                                                                         | 1.268 Mg/m <sup>3</sup>                                                                                                                           | 1.268 Mg/m <sup>3</sup>                                                                                                                             |
| Absorption coefficient            | 3.746 mm <sup>−1</sup>                                                                                          | 0.345 mm <sup>−1</sup>                                                                                                                            | 3.190 mm <sup>−1</sup>                                                                                                                              |
| F(000)                            | 3408                                                                                                            | 1088                                                                                                                                              | 1320                                                                                                                                                |
| Crystal size                      | 0.2159 x 0.0564 x 0.0462 mm <sup>3</sup>                                                                        | 0.3190 x 0.2242 x 0.1602 mm <sup>3</sup>                                                                                                          | 0.2784 x 0.1151 x 0.0267 mm <sup>3</sup>                                                                                                            |
| Theta range for data collection   | 3.35 to 76.80°.                                                                                                 | 3.38 to 26.44°.                                                                                                                                   | 4.04 to 63.99°.                                                                                                                                     |
| Index ranges                      | −12<=h<=15, −27<=k<=28, −32<=l<=33                                                                              | −13<=h<=13, −14<=k<=14, −29<=l<=29                                                                                                                | −12<=h<=12, −13<=k<=13, −32<=l<=32                                                                                                                  |
| Reflections collected             | 77882                                                                                                           | 44120                                                                                                                                             | 49482                                                                                                                                               |
| Independent reflections           | 8191 [R(int) = 0.0379]                                                                                          | 10905 [R(int) = 0.0319]                                                                                                                           | 10329 [R(int) = 0.0480]                                                                                                                             |
| Completeness to theta = 26.00°    | 99.3 %                                                                                                          | 99.2 %                                                                                                                                            | 96.4 %                                                                                                                                              |
| Absorption correction             | Analytical                                                                                                      | Analytical                                                                                                                                        | Analytical                                                                                                                                          |
| Max. and min. transmission        | 0.856 and 0.604                                                                                                 | 0.961 and 0.929                                                                                                                                   | 0.941 and 0.675                                                                                                                                     |
| Refinement method                 | Full-matrix least-squares on F <sup>2</sup>                                                                     | Full-matrix least-squares on F <sup>2</sup>                                                                                                       | Full-matrix least-squares on F <sup>2</sup>                                                                                                         |
| Data / restraints / parameters    | 8191 / 0 / 473                                                                                                  | 10905 / 0 / 673                                                                                                                                   | 10329 / 0 / 716                                                                                                                                     |
| Goodness-of-fit on F <sup>2</sup> | 1.057                                                                                                           | 1.078                                                                                                                                             | 1.092                                                                                                                                               |
| Final R indices [I>2sigma(I)]     | R1 = 0.0297, wR2 = 0.0769                                                                                       | R1 = 0.0438, wR2 = 0.1179                                                                                                                         | R1 = 0.0555, wR2 = 0.1627                                                                                                                           |
| R indices (all data)              | R1 = 0.0369, wR2 = 0.0793                                                                                       | R1 = 0.0556, wR2 = 0.1225                                                                                                                         | R1 = 0.0629, wR2 = 0.1681                                                                                                                           |
| Largest diff. peak and hole       | 0.667 and −0.447 e.Å <sup>−3</sup>                                                                              | 0.892 and −0.443 e.Å <sup>−3</sup>                                                                                                                | 1.544 and −1.220 e.Å <sup>−3</sup>                                                                                                                  |
| CCDC no.                          | 2124578                                                                                                         | 2124579                                                                                                                                           | 2124577                                                                                                                                             |

Table S5 – Raman vibration modes of complexes (**10**) – (**12**) collected at room temperature.

| Formula                          | ( <b>10</b> ) | ( <b>11</b> ) | ( <b>12</b> ) |
|----------------------------------|---------------|---------------|---------------|
| Raman Shifts (cm <sup>-1</sup> ) | 237           | 237           | 237           |
|                                  | -             | 302           | 303           |
|                                  | 350           | 351           | 349           |
|                                  | 367           | 368           | 369           |
|                                  | -             | 582           | 569           |
|                                  | 624           | 626           | 625           |
|                                  | 741           | 742           | 741           |
|                                  | 862           | 869           | 866           |
|                                  | 1295          | 1308          | 1300          |
|                                  | 1342          | 1342          | 1340          |
|                                  | 1442          | 1445          | 1444          |
|                                  | 1471          | 1474          | 1474          |
|                                  | 1596          | 1597          | 1597          |
|                                  | 1624          | 1617          | 1617          |



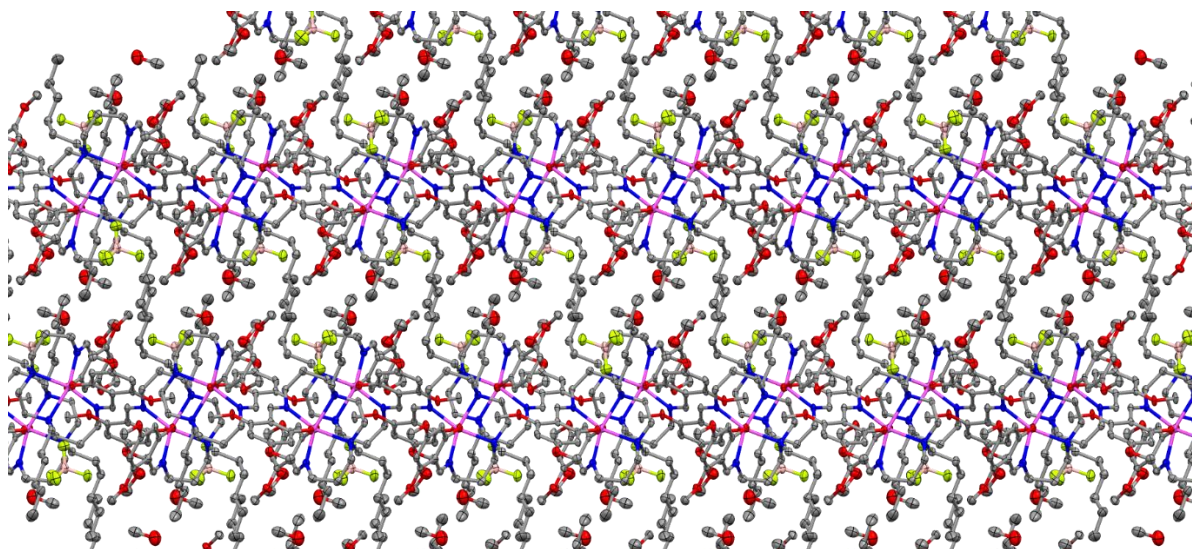

Figure S1 – C<sub>6</sub>-Alkylated complex 6 viewed along b-axis

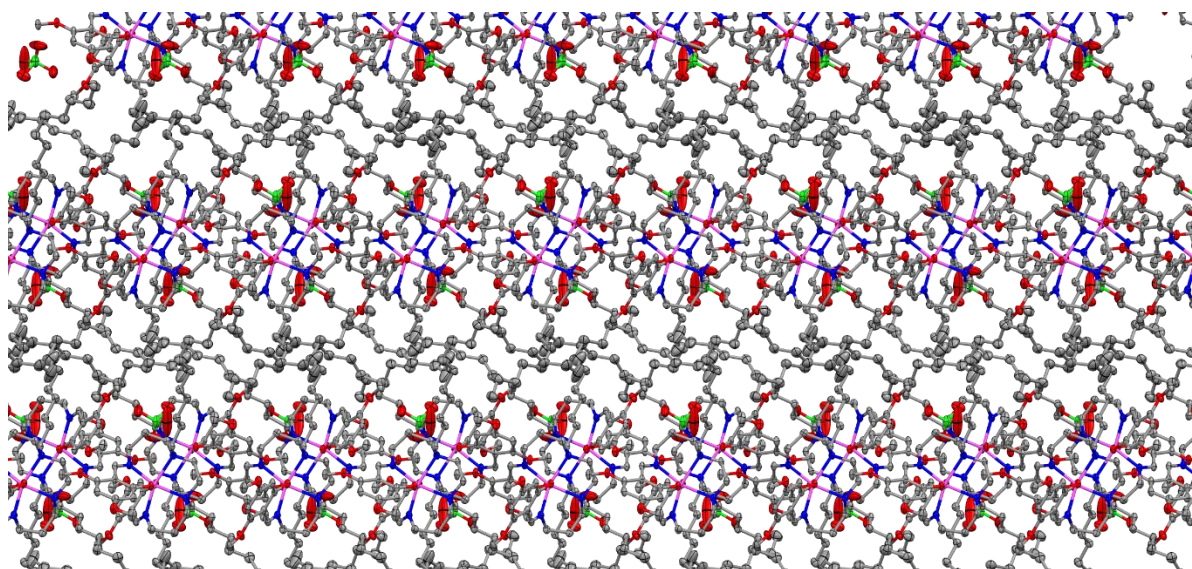

Figure S2 – C<sub>12</sub>-Alkylated complex 7 viewed along the b-axis

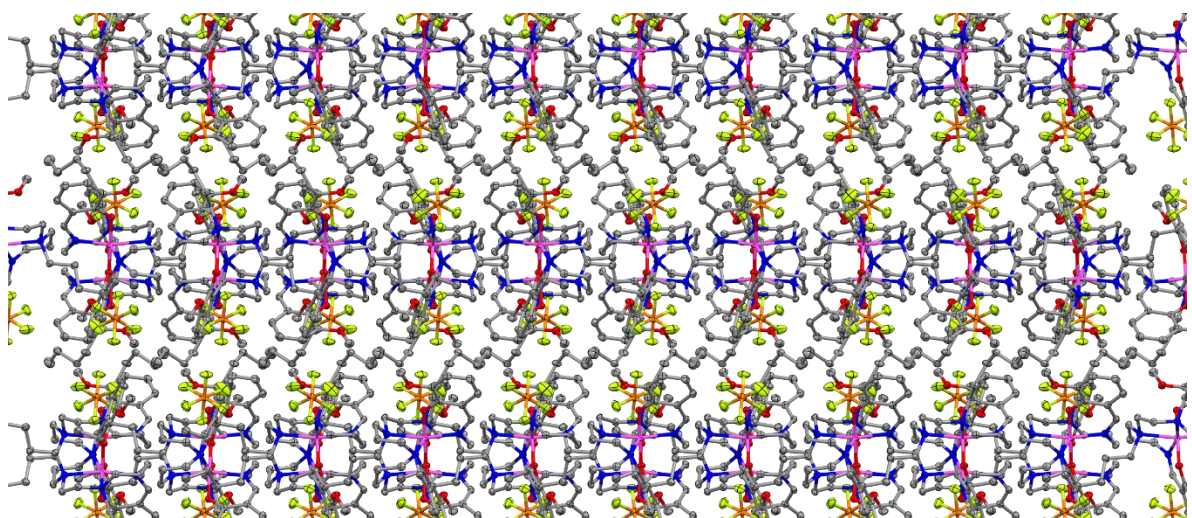

Figure S3 – C<sub>6</sub>-Alkylated complex 10 viewed along the c-axis

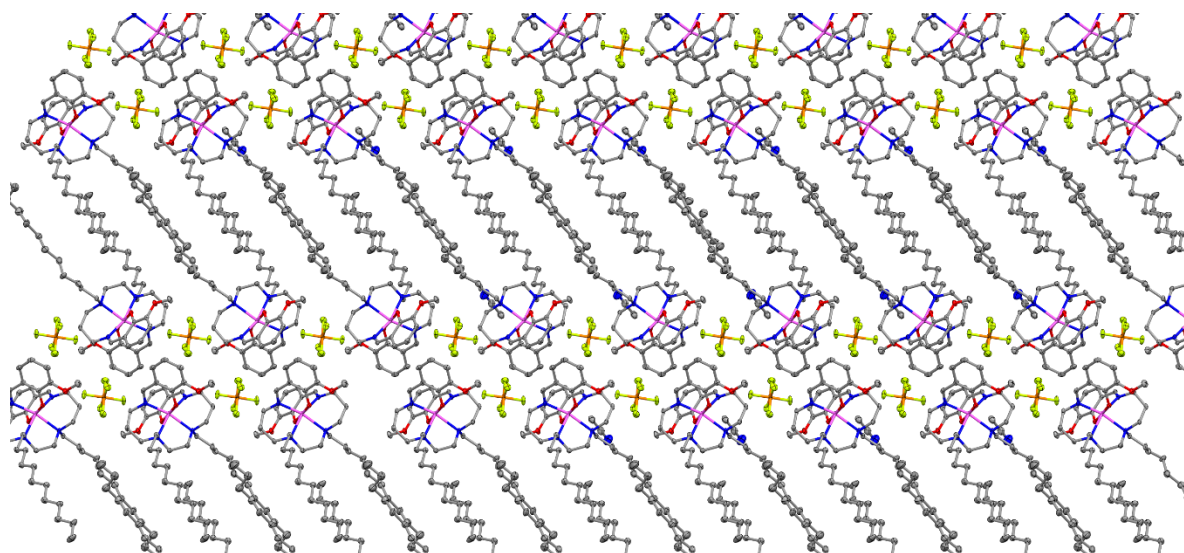

Figure S4 –  $C_{12}$ -Alkylated complex 11 viewed along the  $a$ -axis
